# HIF-1 and SKN-1 Coordinate the Transcriptional Response to Hydrogen Sulfide in *Caenorhabditis elegans*

Dana L. Miller<sup>1,2\*</sup>, Mark W. Budde<sup>2,3</sup>, Mark B. Roth<sup>2\*</sup>

**1** Department of Biochemistry, University of Washington School of Medicine, Seattle, Washington, United States of America, **2** Division of Basic Sciences, Fred Hutchinson Cancer Research Center, Seattle, Washington, United States of America, **3** University of Washington Molecular and Cellular Biology Graduate Program, Seattle, Washington, United States of America

## Abstract

Hydrogen sulfide (H<sub>2</sub>S) has dramatic physiological effects on animals that are associated with improved survival. *C. elegans* grown in H<sub>2</sub>S are long-lived and thermotolerant. To identify mechanisms by which adaptation to H<sub>2</sub>S effects physiological functions, we have measured transcriptional responses to H<sub>2</sub>S exposure. Using microarray analysis we observe rapid changes in the abundance of specific mRNAs. The number and magnitude of transcriptional changes increased with the duration of H<sub>2</sub>S exposure. Functional annotation suggests that genes associated with protein homeostasis are upregulated upon prolonged exposure to H<sub>2</sub>S. Previous work has shown that the hypoxia-inducible transcription factor, HIF-1, is required for survival in H<sub>2</sub>S. In fact, we show that *hif-1* is required for most, if not all, early transcriptional changes in H<sub>2</sub>S. Moreover, our data demonstrate that SKN-1, the *C. elegans* homologue of NRF2, also contributes to H<sub>2</sub>S-dependent changes in transcription. We show that these results are functionally important, as *skn-1* is essential to survive exposure to H<sub>2</sub>S. Our results suggest a model in which HIF-1 and SKN-1 coordinate a broad transcriptional response to H<sub>2</sub>S that culminates in a global reorganization of protein homeostasis networks.

**Citation:** Miller DL, Budde MW, Roth MB (2011) HIF-1 and SKN-1 Coordinate the Transcriptional Response to Hydrogen Sulfide in *Caenorhabditis elegans*. PLoS ONE 6(9): e25476. doi:10.1371/journal.pone.0025476

**Editor:** Todd Lamitina, University of Pennsylvania, United States of America

**Received:** June 4, 2011; **Accepted:** September 5, 2011; **Published:** September 29, 2011

**Copyright:** © 2011 Miller et al. This is an open-access article distributed under the terms of the Creative Commons Attribution License, which permits unrestricted use, distribution, and reproduction in any medium, provided the original author and source are credited.

**Funding:** This work was supported by National Institutes of Health grant K99/R00 AG033050 to Dana L. Miller. The funders had no role in study design, data collection and analysis, decision to publish, or preparation of the manuscript.

**Competing Interests:** The authors have declared that no competing interests exist.

\* E-mail: dlm16@uw.edu (DLM); mroth@fhcrc.org (MBR)

## Introduction

Exogenous H<sub>2</sub>S has dramatic effects on mammalian physiology that can improve survival in changing environmental conditions. Mice exposed to H<sub>2</sub>S enter into a hibernation-like state that allows them to endure periods of low metabolic rate and decreased core body temperature without apparent ill effects [1]. The H<sub>2</sub>S-induced state enables mice to survive exposure to otherwise lethal hypoxic conditions [2], and improves outcome in rodent models of severe blood loss [3], myocardial infarction [4], aortic occlusion [5] and hepatic ischemia/reperfusion [6].

*C. elegans* grown in H<sub>2</sub>S have increased thermotolerance and lifespan [7]. Increased lifespan and thermotolerance require the conserved sirtuin homologue *sir-2.1*, though mutant animals with deletions in *sir-2.1* grow normally in H<sub>2</sub>S. In contrast, the *hif-1* transcription factor is required to survive exposure to H<sub>2</sub>S [8]. *hif-1* is a highly conserved bHLH transcription factor that is well-known for its role in coordinating the transcriptional response to hypoxia in all animals, including *C. elegans* [9,10]. Sirtuins have been shown to modulate lifespan in yeast, worms, flies and mice [11]. Recent work has demonstrated that HIF-1 activity can influence lifespan in *C. elegans* [12,13,14]. Thus, the response to H<sub>2</sub>S involves at least two genes, *hif-1* and *sir-2.1*, which influence lifespan.

In this study, we investigated the transcriptional response to H<sub>2</sub>S in *C. elegans*. Using an unbiased microarray approach, we show that there are rapid and progressive changes in mRNA abundance associated with exposure to H<sub>2</sub>S. Functional genomic

analysis suggests that adaptation to H<sub>2</sub>S results in significant changes to protein homeostasis pathways. We found that *hif-1* is required for nearly all of the early changes observed, though there is little overlap between genes regulated in response to H<sub>2</sub>S and those that have been reported to change in hypoxia. Moreover, our data show that other factors contribute to coordinate the response to H<sub>2</sub>S, as we found that some H<sub>2</sub>S-induced transcriptional changes require the *skn-1* transcription factor. We demonstrate that, like *hif-1*, *skn-1* is required to survive in low concentrations of H<sub>2</sub>S. These data suggest a possible model in which HIF-1 and SKN-1 act together to coordinate a transcriptional response to H<sub>2</sub>S that ultimately leads to alterations in the expression of genes involved in protein homeostasis.

## Results

### H<sub>2</sub>S exposure leads to rapid and progressive changes in mRNA abundance

To investigate the transcriptional responses to H<sub>2</sub>S in *C. elegans*, we employed a microarray approach to identify mRNAs that were altered in abundance by exposure to H<sub>2</sub>S. In these experiments, we exposed synchronized cultures of *C. elegans* to 50 ppm H<sub>2</sub>S for 1, 12 or 48 h (schematized in Fig. 1A). We measured the response to 50 ppm H<sub>2</sub>S, as this is the same concentration of H<sub>2</sub>S that increases lifespan and thermotolerance [7]. Exposure to H<sub>2</sub>S was immediately prior to harvest. We previously showed that developmental rate is not affected by this concentration of H<sub>2</sub>S [7], ensuring that all animals were first-day adults when RNA was

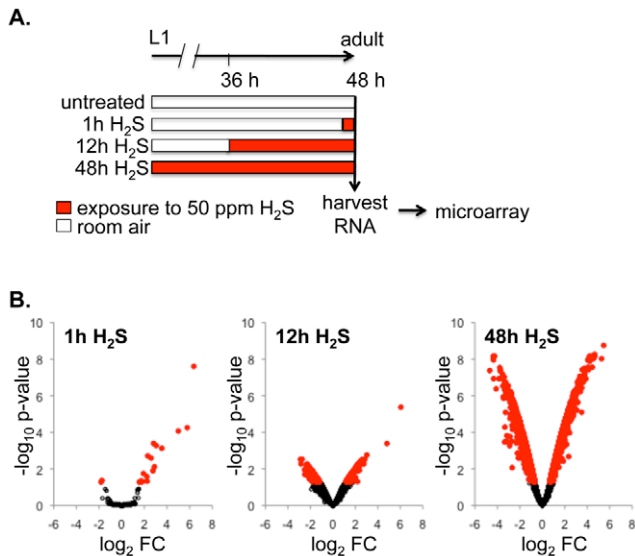

**Figure 1. Exposure to H<sub>2</sub>S induces rapid and progressive changes in mRNA abundance.** A. Experimental design schematic. *C. elegans* were grown from synchronized first-stage larvae (L1) for 48 h to young adult before being collected for RNA extraction. Each bar represents 48 h from L1 to first-day adult for one experimental group. Time in room air is indicated in white and time in H<sub>2</sub>S indicated in red. Exposure to H<sub>2</sub>S (50 ppm in room air) was always immediately prior to isolating RNA. B. Changes in mRNA abundance measured by microarray. Plots show magnitude of change in transcript level (log<sub>2</sub> FC) as a function of adjusted p-value (log<sub>10</sub> p-value). Each point is data from one gene product. Significant changes (adj. p-value < 0.05) are red. After 1 h exposure to H<sub>2</sub>S (left), 16 genes were significantly up-regulated and one was down-regulated (Table 1). After 12 h exposure to H<sub>2</sub>S (middle), 445 transcripts were significantly changed, with 259 up-regulated (Tables 1 and S1). After 48 h in H<sub>2</sub>S (right), 5089 transcripts were significantly altered relative to untreated controls (Table S2). doi:10.1371/journal.pone.0025476.g001

harvested. This experimental design enabled us to compare transcript abundance without confounding effects from comparing different developmental stages.

The number of transcriptional changes we observed in animals exposed to H<sub>2</sub>S increased with the duration of exposure (Figure 1B). After 1 h exposure we detected significantly altered mRNA levels of 17 transcripts (adjusted p-value < 0.05, see Experimental Procedures). All but one of these transcripts was more abundant in the animals exposed to H<sub>2</sub>S compared to untreated controls (Table 1), suggesting that the transcription of these genes was increased upon exposure to H<sub>2</sub>S. The effect of H<sub>2</sub>S on transcript abundance progressed with increased duration of exposure to H<sub>2</sub>S, both in magnitude of effect on mRNA level and number of gene products affected. After 12 h exposure to H<sub>2</sub>S, we observed 445 mRNA that were significantly changed, 259 (58%) of which were more abundant after exposure to H<sub>2</sub>S (Table S1). Nine of the 16 gene products that were increased after 1 h exposure to H<sub>2</sub>S were still significantly increased after 12 h in H<sub>2</sub>S. The scope and magnitude of transcript alterations was even more pronounced after 48 h in H<sub>2</sub>S, the time required to observe an increase in lifespan and thermotolerance [7]. We observed 5,089 genes that had significantly altered mRNA levels after 48 h exposure to H<sub>2</sub>S (Table S2), which represents 44% of the gene products included in the analysis. Of the significantly altered transcripts, 143 were increased by at least 5.5-fold and 126 were decreased by at least 5.5-fold. Together, these data indicate that there is a rapid and progressive induction of transcriptional activity upon exposure to H<sub>2</sub>S.

We used quantitative reverse transcript PCR (qRT-PCR) to validate changes in mRNA levels that we observed by microarray. We focused on transcripts that changed after brief exposure to H<sub>2</sub>S, reasoning that these early transcriptional changes represent the initial response to H<sub>2</sub>S and may be important to set up later, more progressive changes. When wild-type animals were grown on *E. coli* strain OP50, 6 of the 11 gene products that were predicted to be increased based on the microarray data were more abundant after 1 h exposure to H<sub>2</sub>S (Table 2). Several of the gene products trended toward higher expression, but did not reach significance in this assay. For many of these, we noticed that the level of transcript measured in the untreated sample was near background, which may have increased the variance in the measurements. These changes did reach significance when animals were grown on HT115(DE3) RNAi control food. In these conditions, 10 of the 11 gene products tested were upregulated after 1 h exposure to H<sub>2</sub>S (Table 2). In general, the magnitude of H<sub>2</sub>S-induced changes in transcript abundance was greater on RNAi food than on OP50. The source of this variation is unclear, but may hint at an effect of nutritional status on adaptation to H<sub>2</sub>S. Indeed, the HT115(DE3) bacterial food used for feeding RNAi has previously been shown to affect survival in hypoxia (DLM and MBR, unpublished observation and [15]), consistent with the idea that nutritional status can influence responses to environmental changes. The one gene product that was less abundant after exposure to H<sub>2</sub>S by microarray, C18H7.1, was not significantly altered after exposure to H<sub>2</sub>S in either nutrient condition in qRT-PCR measurements. Further validating these results, our microarray data corroborate previous studies that showed T05B4.2 (*nhr-57*) and K10H10.2 (*cysl-2*) are upregulated after short exposure to H<sub>2</sub>S [8]. We conclude that our microarray experiments identified transcripts that change in mRNA abundance associated with exposure to H<sub>2</sub>S.

## Function annotation of genes induced by exposure to H<sub>2</sub>S

Only 16 gene products were more abundant after exposure to H<sub>2</sub>S for 1 h, which precluded the use of bioinformatic analysis to measure enrichment of functional classes. However, we noticed that many of the genes on this list are annotated to be involved in cellular metabolic processes (Table 1). The most-highly expressed gene in response to H<sub>2</sub>S is a glutathione-S transferase, F37B1.8 (*gst-19*). Two other up-regulated genes are predicted to have a role in amino acid metabolism, including the rate-limiting enzyme in serine production, phosphoglycerate dehydrogenase (C31C9.2), and an enzyme with homology to cysteine synthase (*cysl-2*, K10H10.2). We also observed upregulation of *nit-1* (ZK1058.6), a predicted carbon-nitrogen hydrolase. In addition to metabolic enzymes, exposure to H<sub>2</sub>S also resulted in the upregulation of 6 of the 8 *nspe* (nematode specific peptide, class E) genes. There is little known about these genes, other than they code for short peptides, 70–75 amino acids long, that are annotated to be integral to the membrane. Although the *nspe* transcripts were greatly increased in abundance after 1 h exposure to H<sub>2</sub>S, they were not significantly changed after 12 h exposure to H<sub>2</sub>S, suggesting that they were only transiently upregulated. Instead, after 12 h in H<sub>2</sub>S we found that 8 of the 12 *nspe* (nematode specific peptide, class A) transcripts were significantly upregulated (Table S1).

To evaluate functional categories of genes over-represented in the microarray dataset of transcripts changed after longer exposure to H<sub>2</sub>S, we employed the online Database for Annotation, Visualization and Integrated Discovery (DAVID, v6.7) functional annotation clustering tool [16,17]. We focused on gene products that were most increased in response to H<sub>2</sub>S, as we

**Table 1.** Changes in mRNA abundance associated with exposure to H<sub>2</sub>S.

| <b>Significant changes after 1 h exposure to 50 ppm H<sub>2</sub>S</b>                      |                                                                      |                    |                           |
|---------------------------------------------------------------------------------------------|----------------------------------------------------------------------|--------------------|---------------------------|
| <b>Probe</b>                                                                                | <b>gene name; description</b>                                        | <b>fold-change</b> | <b>adj. p<sup>a</sup></b> |
| Y38E10A.25                                                                                  | <i>nspe-6</i> ; nematode specific peptide family, group E            | 84.4               | $2.5 \times 10^{-8}$      |
| Y38E10A.12                                                                                  | <i>nspe-3</i> ; nematode specific peptide family, group E            | 55.7               | $5.6 \times 10^{-5}$      |
| F37B1.8                                                                                     | <i>gst-19</i> ; glutathione S-transferase                            | 32                 | $8.5 \times 10^{-5}$      |
| ZK1058.6                                                                                    | <i>nit-1</i> ; carbon-nitrogen hydrolase                             | 7                  | $4.1 \times 10^{-4}$      |
| T05B4.1                                                                                     | <i>lgc-1</i> ; predicted ligand-gated ion channel                    | 8                  | $5.3 \times 10^{-4}$      |
| Y38E10A.15                                                                                  | <i>nspe-7</i> ; nematode specific peptide, group E                   | 11.3               | $7.4 \times 10^{-4}$      |
| R08E5.1                                                                                     | not annotated                                                        | 4.9                | $1.9 \times 10^{-3}$      |
| Y38E10A.26                                                                                  | <i>nspe-2</i> ; nematode specific peptide family, group E            | 6.1                | $2.5 \times 10^{-3}$      |
| F02H6.5                                                                                     | <i>sqrd-1</i> ; sulfide:quinone oxidoreductase                       | 7.5                | $7.6 \times 10^{-3}$      |
| K10H10.3a                                                                                   | <i>dhs-8</i> ; dehydrogenase with different specificities            | 7                  | 0.013                     |
| K10H10.2                                                                                    | <i>cysl-2</i> ; cysteine synthase related                            | 3.7                | 0.018                     |
| T05B4.2                                                                                     | <i>nhr-57</i> ; hormone receptors                                    | 4.6                | 0.026                     |
| C18H7.1                                                                                     | von Willebrand factor and related coagulation proteins               | −3.2               | 0.043                     |
| C31C9.2                                                                                     | D-3-phosphoglycerate dehydrogenase                                   | 3.2                | 0.046                     |
| W07A12.7                                                                                    | <i>rhy-1</i> ; regulator of <i>hif-1</i> , predicted acyltransferase | 4.6                | 0.047                     |
| Y38E10A.16                                                                                  | <i>nspe-5</i> ; nematode specific peptide family, group E            | 3.2                | 0.049                     |
| Y38E10A.11                                                                                  | <i>nspe-4</i> ; nematode specific peptide family, group E            | 3.5                | 0.049                     |
| <b>Most increased transcripts in abundance after 12 h exposure to 50 ppm H<sub>2</sub>S</b> |                                                                      |                    |                           |
| <b>Probe</b>                                                                                | <b>gene name; description</b>                                        | <b>fold-change</b> | <b>adj. p<sup>a</sup></b> |
| F37B1.8                                                                                     | <i>gst-19</i> ; glutathione S-transferase                            | 66                 | $4.2 \times 10^{-6}$      |
| R08F11.4                                                                                    | SAM-dependent methyltransferases                                     | 28                 | $4.1 \times 10^{-4}$      |
| F02H6.5                                                                                     | <i>sqrd-1</i> ; sulfide:quinone oxidoreductase                       | 8.2                | $1.7 \times 10^{-3}$      |
| T24B8.5                                                                                     | ShK-like toxin peptide containing a domain rich in cysteine          | 7.2                | $3.0 \times 10^{-3}$      |
| Y41C4A.17                                                                                   | not annotated                                                        | 6.8                | $5.3 \times 10^{-3}$      |
| F58E6.7                                                                                     | not annotated                                                        | 6.6                | $5.3 \times 10^{-3}$      |
| F15B9.1                                                                                     | not annotated                                                        | 6.5                | $5.3 \times 10^{-3}$      |
| K11G9.6                                                                                     | <i>mtl-1</i> ; predicted metallothionein, cysteine-rich              | 6.3                | $5.3 \times 10^{-3}$      |
| ZK899.6                                                                                     | not annotated                                                        | 6.2                | $3.7 \times 10^{-3}$      |
| R08E5.1                                                                                     | not annotated                                                        | 6.1                | $3.1 \times 10^{-3}$      |
| Y110A2AL.3                                                                                  | not annotated                                                        | 5.5                | $3.6 \times 10^{-3}$      |
| F46C5.1                                                                                     | not annotated                                                        | 5.2                | $1.2 \times 10^{-2}$      |
| C52D10.7                                                                                    | <i>skr-9</i> ; SCF ubiquitin ligase, Skp1 component                  | 5.0                | $7.4 \times 10^{-3}$      |
| F18E3.2                                                                                     | <i>srw-67</i> ; 7-transmembrane olfactory receptor                   | 4.8                | 0.01                      |
| C03E10.6                                                                                    | <i>clcc-222</i> ; C-type lectin                                      | 4.7                | $5.3 \times 10^{-3}$      |
| M162.5.1                                                                                    | Permease of the major facilitator superfamily                        | 4.7                | $5.3 \times 10^{-3}$      |
| C45G7.2                                                                                     | <i>ilys-2</i> ; invertebrate lysozyme                                | 4.6                | 0.049                     |
| ZC412.6                                                                                     | <i>nspa-5</i> ; nematode specific peptide, class A                   | 4.6                | 0.013                     |
| Y22D7AR.10                                                                                  | Histone acetyltransferase (MYST family)                              | 4.5                | 0.01                      |
| H12D21.1                                                                                    | <i>nspa-1</i> ; nematode specific peptide, class A                   | 4.5                | $6.0 \times 10^{-3}$      |
| R09E12.9                                                                                    | not annotated                                                        | 4.2                | $7.4 \times 10^{-3}$      |
| H12D21.13                                                                                   | <i>nspa-4</i> ; nematode specific peptide, class A                   | 4.1                | 0.011                     |
| H12D21.12                                                                                   | <i>nspa-2</i> ; nematode specific peptide, class A                   | 4.1                | $8.2 \times 10^{-3}$      |
| F01D5.3                                                                                     | Secreted surface protein                                             | 4.0                | 0.029                     |
| C54F6.5                                                                                     | not annotated                                                        | 4.0                | 0.011                     |
| C34E11.4                                                                                    | not annotated                                                        | 4.0                | 0.011                     |
| H12D21.14                                                                                   | <i>nspa-6</i> ; nematode specific peptide, class A                   | 4.0                | 0.011                     |
| Y50E8A.17                                                                                   | <i>nspa-10</i> ; nematode specific peptide, class A                  | 4.0                | 0.013                     |

**Table 1.** Cont.

| Most increased transcripts in abundance after 12 h exposure to 50 ppm H <sub>2</sub> S |                        |             |                     |
|----------------------------------------------------------------------------------------|------------------------|-------------|---------------------|
| Probe                                                                                  | gene name; description | fold-change | adj. p <sup>a</sup> |
| Y27F2A.8                                                                               | not annotated          | 4.0         | 0.011               |
| K10G6.5                                                                                | not annotated          | 3.9         | 0.01                |

<sup>a</sup>adjusted p-value, corrected for multiple testing and false discovery rate.  
doi:10.1371/journal.pone.0025476.t001

hypothesize that these might be important for the phenotypic changes that we observe and likely to be most robust. This analysis showed that there were two highly enriched functional clusters in the genes increased by at least 3-fold after 12 h exposure to H<sub>2</sub>S (Table 3, Table S3). The most enriched cluster included gene ontology terms related to aging and stress resistance. This result is consistent with our previous observation that adaptation to H<sub>2</sub>S increases lifespan and thermotolerance [7].

We observed that proteins with the F-box motif were enriched in the genes upregulated by H<sub>2</sub>S. F-box proteins were first identified as members of the SCF (Skp-cullin-F-box) ubiquitin ligase complex that targets proteins for ubiquitination and eventual degradation [18,19]. F-box proteins were significantly enriched in genes upregulated after 12 h exposure to H<sub>2</sub>S (Table 3). These data raise the possibility that the response to H<sub>2</sub>S alters the stability of proteins regulated by the ubiquitin-proteasome system. When we extended this analysis to define the functional clusters in gene products upregulated by at least 5-fold after 48 h exposure to H<sub>2</sub>S, we observed an even greater enrichment of F-box containing proteins (Table 3). Moreover, the second most enriched cluster included genes associated with the BTB/POZ domain, another protein-protein interaction motif that has been associated with SCF function [20]. We did not observe an enrichment of genes involved in aging or stress resistance after 48 h exposure to H<sub>2</sub>S. Together, these data show

that the transcriptional response to H<sub>2</sub>S includes many gene products involved in protein turnover mediated by the ubiquitin proteasome system.

### The *hif-1* transcription factor is required for H<sub>2</sub>S-induced transcriptional changes

HIF-1 is the *C. elegans* homologue of the highly conserved hypoxia inducible transcription factor, best known for its role in coordinating the transcriptional response to decreased O<sub>2</sub> [9,10,21]. Recently, it has been demonstrated that *C. elegans* require *hif-1* to survive exposure to H<sub>2</sub>S [8]. On exposure to H<sub>2</sub>S, the HIF-1 protein accumulates and is localized to the nucleus. At least some transcriptional responses to H<sub>2</sub>S result from the activation of HIF-1, including K10H10.2 (*cysl-2*), *nhr-57*, and *sqrd-1* [8,22]. These observations motivated us to consider the possibility that our microarray data might reveal other *hif-1*-dependent transcriptional responses to H<sub>2</sub>S.

We measured the abundance of mRNA in *hif-1(ia04)* mutant animals exposed to H<sub>2</sub>S for 1 h by qRT-PCR to evaluate if *hif-1* is required for transcriptional changes that occur upon exposure to H<sub>2</sub>S. This short exposure to H<sub>2</sub>S was sufficient to induce transcriptional changes in wild-type, but was not lethal to the *hif-1(ia04)* mutant animals. In fact, after 1 h in H<sub>2</sub>S the *hif-1(ia04)* mutant animals were still moving normally [8]. We found that for 5 of 11 mRNAs tested, transcript levels in *hif-1(ia04)* mutant animals were significantly lower than wild-type (Figure 2). This includes the most highly-induced mRNAs. In the *hif-1(ia04)* mutant animals we observed very little change in any transcript abundance after exposure to H<sub>2</sub>S, both for messages that were highly induced as well as the lower-expressed transcripts where statistical significance of  $p < 0.05$  was not achieved. We conclude that *hif-1* has a centrally important function in inducing transcriptional changes associated with exposure to H<sub>2</sub>S, particularly those changes that occur immediately upon exposure to H<sub>2</sub>S.

Although the response to hypoxia and H<sub>2</sub>S both require the *hif-1* transcription factor, there is little overlap between genes regulated in these two conditions. A previous report identified 68 hypoxia-induced, HIF-1-dependent transcriptional changes in *C. elegans* [15]. Of the 16 genes upregulated after 1 h exposure to H<sub>2</sub>S, only 3 (19%) are also regulated by *hif-1* in hypoxia: *nhr-57*, *rhy-1* and K10H10.2 (*cysl-2*) (Figure 2B, Table S4). The slight overlap between these data sets is greater than would be expected by chance (hypergeometric probability 0.001), consistent with our observation that *hif-1* is required for both responses. Similarly, of the 298 transcripts that are more abundant after 12 h exposure to H<sub>2</sub>S, 8 (3%) are also regulated by hypoxia (hypergeometric probability 0.006; Figure 2C, Table S4). Since *hif-1(ia04)* mutant animals die after 12 h exposure to H<sub>2</sub>S we could not determine which of these changes were *hif-1*-dependent. Thus, we included all hypoxia-induced genes, regardless of whether they require *hif-1*.

**Table 2.** qRT-PCR Validation of changes in transcript abundance after 1 h H<sub>2</sub>S.

| fold-change: | microarray <sup>a</sup> | OP50 <sup>b</sup> | HT115      |
|--------------|-------------------------|-------------------|------------|
| Y38E10A.12   | 56                      | 73.0±2.8*         | 144.8±2.4* |
| F37B1.8      | 32                      | 7.4±1.6*          | 153.9±1.7* |
| ZK1058.6     | 7                       | 11.2±2.4*         | 18.4±1.2*  |
| T05B4.1      | 8                       | 6.9±3.0           | 16.2±1.7*  |
| R08E5.1      | 4.9                     | 2.1±2.6           | 7.4±1.4    |
| F02H6.5      | 7.5                     | 3.0±1.9           | 12.9±1.2*  |
| K10H10.3a    | 7                       | 1.8±1.3           | 10.2±1.2*  |
| K10H10.2     | 3.7                     | 18.9±7.5*         | 20.6±1.6*  |
| T05B4.2      | 4.6                     | 5.0±3.7           | 7.4±2.1*   |
| C18H7.1      | −3.2                    | −1.7±2.0          | 1.4±1.5    |
| C31C9.2      | 3.2                     | 2.2±1.2*          | 9.4±2.7*   |
| W07A12.7     | 4.6                     | 3.1±1.9*          | 10.4±1.2*  |

<sup>a</sup>Fold-change of transcript as measured by microarray, as in Table 1.

<sup>b</sup>Fold-change of transcript as measured by qRT-PCR. Animals were grown on *E. coli* OP50 strain or the HT115(DE3) strain containing the control RNAi plasmid L440.

\* $p < 0.05$ .

doi:10.1371/journal.pone.0025476.t002

**Table 3.** Functional annotation of gene products increased after exposure to H<sub>2</sub>S.

| <b>12 h exposure to H<sub>2</sub>S<sup>a</sup></b>               |              |                        |                    |
|------------------------------------------------------------------|--------------|------------------------|--------------------|
| <b>Aging and Stress Response cluster; enrichment score = 2.4</b> |              |                        |                    |
| <b>Term</b>                                                      | <b>count</b> | <b>fold enrichment</b> | <b>p</b>           |
| GO:0009408: response to heat                                     | 3            | 40                     | 0.0022             |
| GO:0007568: aging                                                | 5            | 7.7                    | 0.0029             |
| GO:0008340: determination of adult life span                     | 5            | 7.7                    | 0.0029             |
| GO:0010259: multicellular organismal aging                       | 5            | 7.7                    | 0.0029             |
| GO:0009266: response to temperature stimulus                     | 3            | 25                     | 0.0055             |
| GO:0009628: response to abiotic stimulus                         | 3            | 13                     | 0.021              |
| <b>F-box associated cluster; enrichment score = 1.2</b>          |              |                        |                    |
| <b>Term</b>                                                      | <b>count</b> | <b>fold enrichment</b> | <b>p</b>           |
| SM00256: FBOX                                                    | 5            | 3.4                    | 0.048              |
| IPR001810: Cyclin-like F-box                                     | 5            | 3.4                    | 0.057              |
| IPR012885: F-box associated type 2                               | 3            | 3.3                    | 0.12               |
| <b>48 h exposure to H<sub>2</sub>S<sup>b</sup></b>               |              |                        |                    |
| <b>F-box associated cluster; enrichment score = 20.3</b>         |              |                        |                    |
| <b>Term</b>                                                      | <b>count</b> | <b>fold enrichment</b> | <b>p</b>           |
| IPR012885: F-box associated type 2                               | 25           | 27                     | $1 \times 10^{28}$ |
| IPR001810: Cyclin-like F-box                                     | 25           | 11                     | $2 \times 10^{19}$ |
| SM00256: FBOX                                                    | 25           | 6.7                    | $5 \times 10^{15}$ |
| <b>BTB/POZ associated cluster; enrichment score = 1.1</b>        |              |                        |                    |
| <b>Term</b>                                                      | <b>count</b> | <b>fold enrichment</b> | <b>p</b>           |
| IPR011333: BTB/POZ fold                                          | 5            | 6.0                    | 0.009              |
| IPR013069: BTB/POZ                                               | 3            | 3.2                    | 0.09               |
| IPR000210: BTB/POZ-like                                          | 3            | 3.2                    | 0.18               |
| SM00225: BTB                                                     | 3            | 3.2                    | 0.37               |
| <b>transcription associated cluster; enrichment score = 0.8</b>  |              |                        |                    |
| <b>Term</b>                                                      | <b>count</b> | <b>fold enrichment</b> | <b>p</b>           |
| GO:0030528: transcription regulator activity                     | 6            | 3.3                    | 0.02               |
| GO:0045449: regulation of transcription                          | 6            | 2.5                    | 0.07               |
| GO:0006355: regulation of transcription, DNA-dependent           | 5            | 2.5                    | 0.1                |
| GO:0051252: regulation of RNA metabolic process                  | 5            | 2.5                    | 0.1                |
| GO:0003700: transcription factor activity                        | 4            | 2.7                    | 0.2                |
| GO:0003677: DNA binding                                          | 4            | 1.7                    | 0.4                |
| SP_PIR_KEYWORD: dna-binding                                      | 3            | 1.1                    | 0.8                |
| SP_PIR_KEYWORD: nucleus                                          | 4            | 0.9                    | 0.8                |
| <b>metal binding cluster; enrichment score = 0.8</b>             |              |                        |                    |
| <b>Term</b>                                                      | <b>count</b> | <b>fold enrichment</b> | <b>p</b>           |
| IPR000571: Zinc finger, CCCH-type                                | 3            | 16                     | 0.01               |
| SM00356: ZnF_C3H1                                                | 3            | 9.5                    | 0.04               |
| GO:0046914~transition metal ion binding                          | 7            | 1.6                    | 0.19               |
| GO:0008270~zinc ion binding                                      | 6            | 1.8                    | 0.19               |
| GO:0046872~metal ion binding                                     | 7            | 1.4                    | 0.35               |
| GO:0043169~cation binding                                        | 7            | 1.3                    | 0.38               |
| GO:0043167~ion binding                                           | 7            | 1.3                    | 0.38               |

Table 3. Cont.

| metal binding cluster; enrichment score = 0.8 |       |                 |      |
|-----------------------------------------------|-------|-----------------|------|
| Term                                          | count | fold enrichment | p    |
| SP_PIR_KEYWORD: zinc                          | 5     | 1.3             | 0.51 |
| SP_PIR_KEYWORD: metal-binding                 | 6     | 1.3             | 0.51 |

<sup>a</sup>12 h gene list included 91 genes whose mRNA was significantly increased after 12 h exposure to H<sub>2</sub>S (greater than 3-fold change in mRNA abundance, corrected p<0.05).

<sup>b</sup>48 h gene list included 95 genes whose mRNA was significantly increased after 48 h exposure to H<sub>2</sub>S (greater than 5.6-fold change in mRNA abundance, corrected p<1×10<sup>-5</sup>).

doi:10.1371/journal.pone.0025476.t003

These results show that there is statistically significant, though rather minimal similarity between transcriptional responses to H<sub>2</sub>S and hypoxia. Although our microarrays were not performed under exactly the same conditions as the previous hypoxia studies, these results suggest the interesting possibility that HIF-1 activates different spectrum of targets depending on whether it is activated by hypoxia or H<sub>2</sub>S. Consistent with this view, HIF-1 activity, as measured by an *nhr-57::GFP* transcriptional reporter, is in different tissues of animals exposed to hypoxia as compared to H<sub>2</sub>S [8].

### Role of SKN-1 in response to H<sub>2</sub>S

We noted many Sdz genes were upregulated after 12 or 48 h exposure to H<sub>2</sub>S, including several with F-box domains (Tables S1 and S2). Sdz genes were named for their *skn-1* dependent zygotic expression during embryogenesis between the 4- and 12- cell stage [23]. Several Sdz transcripts that were more abundant after exposure to H<sub>2</sub>S contained F-box domains (Table S3). *skn-1* is a maternally-supplied factor required early in embryogenesis for specification of the EMS blastomere that gives rise to mesodermal lineages [24], and acts postembryonically in the intestine to control the phase II response to oxidative stress [25] and in the two ASI neurons to control the effects of dietary restriction on lifespan [26]. The abundance of Sdz genes on the list led us to consider the possibility that *skn-1* is also involved in the response to H<sub>2</sub>S.

To test the possibility that H<sub>2</sub>S-induced transcriptional changes depended on *skn-1*, we measured mRNA abundance by qRT-PCR from N2 wild-type animals raised on *skn-1(RNAi)* and exposed to H<sub>2</sub>S for 1 h as adults. These animals laid only dead eggs, demonstrating that SKN-1 levels were reduced below those required for early embryonic development. We found that 7 of the gene products showed *skn-1*-dependent changes in abundance after 1 h exposure to H<sub>2</sub>S (Figure 3). Three genes regulated in a *skn-1*-dependent manner in response to H<sub>2</sub>S, C31C9.2, K10H10.2 and ZK1058.6 (*nit-1*), were previously shown to be regulated by *skn-1* postembryonically [27], as was embryonic expression of ZK1058.6 in the EMS lineage after the 4-cell stage and in E descendants after the 300-cell stage [23]. In addition to previously-identified *skn-1* dependent transcripts, H<sub>2</sub>S-induced upregulation of Y38D10A.12 and T05B4.1 also required *skn-1*. The promoter region of all these genes contain core *skn-1* consensus binding sequences, RTACT [27] (Figure 3A). We further observed that three gene products up-regulated by 1 h exposure to H<sub>2</sub>S were changed even more dramatically in the *skn-1(RNAi)* animals: K01H10.2, F37B1.8 (*gst-19*) and W07A12.7 (*rhy-1*). These data are consistent with reports that *skn-1* can act to negatively regulate the expression of genes involved in the response to some oxidative stresses [27]. Our data show that *skn-1* acts to both up and down regulate genes in response to H<sub>2</sub>S.

There is minimal overlap between transcriptional responses to H<sub>2</sub>S and previously characterized, post-embryonic *skn-1* dependent transcripts (Figure 3B, Table S5). We observed significant overlap

between the set of genes changed in response to H<sub>2</sub>S and transcripts that require *skn-1* for normal expression in unstressed conditions (16 genes in common, hypergeometric probability 0.006) [27], though 4 of these 16 genes were less abundant after exposure to H<sub>2</sub>S. Similarly, 10 H<sub>2</sub>S-regulated genes were identified as *skn-1* dependent targets in response to arsenic stress (hypergeometric probability 0.01) [27]. In contrast, we did not observe significant overlap with *skn-1*-dependent targets induced by exposure to t-butyl hydroperoxide (hypergeometric probability 0.06) [27], those downregulated in unstressed conditions (hypergeometric probability 0.13) [27], or messages regulated in response to hyperoxia (hypergeometric probability 0.15) [28]. Our observations suggest that *skn-1*-dependent transcriptional responses to H<sub>2</sub>S are somewhat distinct from *skn-1* mediated responses to oxidative and xenobiotic stress. This is consistent with accumulating evidence that *skn-1* transcriptional outputs are context dependent [27].

We monitored the viability of *skn-1* mutant animals exposed to H<sub>2</sub>S to evaluate the functional significance of the *skn-1*-dependent transcriptional response (Figure 3C). Like wild-type animals, all *skn-1(zu169)/nT1* control animals survived exposure to 50 ppm H<sub>2</sub>S (n = 24, 2 independent experiments). In contrast, none of the *skn-1(zu169)* homozygous mutant animals tested survived (n = 28 in same 2 experiments). To rule out the possibility that H<sub>2</sub>S-induced death was a result of the *nT1* balancer chromosome, we crossed the balancer away from the *zu169* allele. 24% (16/68) of the self-progeny from *zu169/+* heterozygotes died when exposed to 50 ppm H<sub>2</sub>S. This is not statistically different the expected frequency of *skn-1(zu169)* homozygotes (25%;  $\chi^2 = 0.078$ , df = 1, p>0.05). Of the survivors, 14/15 were fertile, indicating that these animals were not homozygous for the *skn-1* allele, which confers a maternal-effect lethal phenotype. We conclude that the *skn-1(zu169)* homozygous animals died when exposed to H<sub>2</sub>S. These data demonstrate that SKN-1 activity is essential to appropriately respond to H<sub>2</sub>S.

### Discussion

Our results indicate that *hif-1* and *skn-1* cooperate to orchestrate a progressive transcriptional response to H<sub>2</sub>S. Previous studies have demonstrated *hif-1* dependent responses to H<sub>2</sub>S [8,22]. We have extended this observation using an unbiased microarray approach that identified several new *hif-1*-dependent transcriptional changes upon exposure to H<sub>2</sub>S. In addition, we have identified *skn-1* as another essential factor during exposure to H<sub>2</sub>S.

H<sub>2</sub>S protects mice from otherwise lethal whole-body hypoxia [2] and improves outcome in a variety of rodent models of ischemia/reperfusion injury [4,29,30]. The mammalian orthologue of HIF-1 has been implicated in protection against ischemia/reperfusion in mammals [31]. Thus, the observation that HIF-1 is activated by H<sub>2</sub>S suggests a mechanistic basis for the beneficial effects of H<sub>2</sub>S [8]. Curiously, our data suggest that there is little

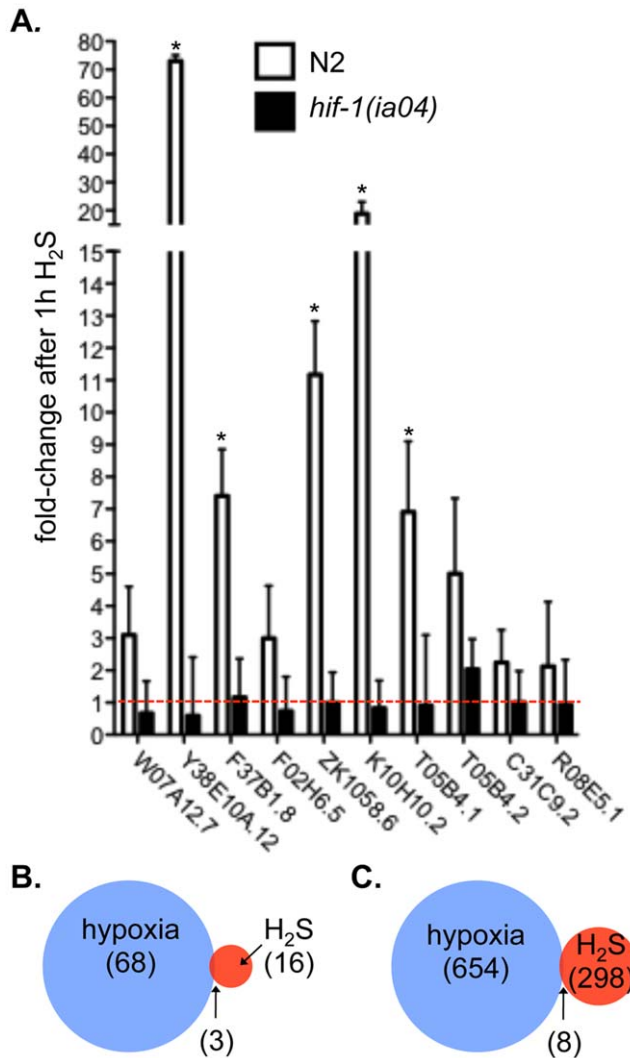

**Figure 2. HIF-1 is required for early transcriptional responses to H<sub>2</sub>S.** A. H<sub>2</sub>S-induced transcriptional changes require HIF-1. Changes in mRNA abundance after 1 h exposure to H<sub>2</sub>S were measured by qRT-PCR in wild-type (N2, open bars) and *hif-1(ia04)* mutant animals (filled bars). Three biological replicates for each group were performed, and each PCR reaction was run in duplicate. Error bars represent the standard deviation of the biological replicates, as propagated through the  $\Delta\Delta C_t$  and fold-change calculations. \*Difference between induction in wild-type (N2) is statistically different than in *hif-1(ia04)* mutant animals,  $p < 0.05$ . Red dashed line demarks where transcript levels in H<sub>2</sub>S are the same as in room air. B. Transcriptional changes after 1 h exposure to H<sub>2</sub>S overlap slightly with *hif-1*-dependent changes in response to hypoxia. 3 of 16 transcripts upregulated in response to 1 h exposure to H<sub>2</sub>S were identified as *hif-1*-dependent targets in hypoxia ( $n = 68$ ) [15]. The probability of observing this overlap randomly is 0.001. C. There is minimal overlap between the transcriptional responses to hydrogen sulfide and hypoxia. Venn diagram shows overlap between genes induced by exposure to 12 h H<sub>2</sub>S ( $n = 298$ ) and all genes products that are altered by hypoxia ( $n = 654$ ) [15]. The probability of randomly observing an overlap of 8 genes between these datasets is 0.006. doi:10.1371/journal.pone.0025476.g002

overlap between transcriptional targets of HIF-1 in hypoxia and H<sub>2</sub>S. These results may indicate that H<sub>2</sub>S does not mediate protection against ischemia simply by inducing a standard hypoxia response. Further understanding this conserved adaptive response to H<sub>2</sub>S will provide new insight into mechanisms that can improve homeostasis in changing conditions.

Our finding that SKN-1 plays a role in the response to H<sub>2</sub>S is consistent with a recent report that nuclear accumulation of NRF2, a mammalian homologue of SKN-1, is correlated with H<sub>2</sub>S-induced protection against from ischemia-induced heart failure [30]. SKN-1 controls the Phase II response to toxins and oxidative stress [25]. However, we do not favour the hypothesis that H<sub>2</sub>S activates the Phase II response. The canonical Phase II targets *gst-4* nor *gcs-1* were not dramatically induced by H<sub>2</sub>S, and the H<sub>2</sub>S-induced upregulation of another glutathione S-transferase, *gst-19*, was exaggerated in *skn-1(RNAi)* animals. Moreover, we observed little overlap in genes regulated by *skn-1* in response to xenobiotic or oxidative stress and those that are changed in H<sub>2</sub>S. Instead, we found at least 7 of the gene products included in the F-box and BTB/POZ clusters (Table 3) were identified as *skn-1*-dependent zygotic transcripts [23]. Finally, we did not observe obvious accumulation of *skn-1::GFP* in the intestinal nuclei of animals exposed to H<sub>2</sub>S using epifluorescence microscopy (not shown), although we cannot rule out the possibility that the nuclear enrichment of GFP was below the detection limit in this experiment. We suggest that, during adaptation to H<sub>2</sub>S, *skn-1* may play a role in remodeling the protein turnover machinery.

Protein homeostasis is increasingly appreciated for its importance to aging and age-associated decline [32]. We propose that one consequence of adaptation to H<sub>2</sub>S is to increase transcription of genes related to protein turnover by the ubiquitin ligase and proteasome system, including F-box and BTB/POZ domain proteins. In this model, the effect of H<sub>2</sub>S to increase lifespan and thermotolerance may be attributed, at least in part, from effects on protein homeostasis. Further understanding the mechanisms by which adaptation to H<sub>2</sub>S can improve homeostasis and influence lifespan may provide novel insights into the mechanisms that mediate the beneficial effects of H<sub>2</sub>S in mammals.

## Materials and Methods

### Nematode strains and culture

Strains used were N2 wild-type (Bristol), ZG31 *hif-1(ia04)*, and EU35 *skn-1(zu169)/nT1[unc-2(n754) let-2](IV;V)*. EU35 and RNAi strains mentioned below were a gift from Dr. Jim Priess (Division of Basic Sciences, Fred Hutchinson Cancer Research Center, Seattle, WA). The *ia04* mutation deletes the second through fourth exons of HIF-1 and is a predicted molecular null [9]. *zu169* is an ochre mutation in an exon of *skn-1* shared among all isoforms. The *zu169* mutation is maternal effect lethal [33], abrogates paraquat-induced expression of *gst-4* and *gcs-1* in the intestine [25] and prevents increased lifespan in response to dietary restriction [26].

*C. elegans* were grown on nematode growth medium plates seeded with live *Escherichia coli* OP50 food (NGM/OP50 plates) as described previously [34]. All experiments and worm culturing were conducted at room temperature to avoid effects resulting from changing temperature. Exposure to H<sub>2</sub>S was in continuous flow H<sub>2</sub>S chambers that were created as previously described [7], by continuously diluting 5000 ppm H<sub>2</sub>S/balance N<sub>2</sub> (Airgas, Seattle, WA USA) with house air to a final concentration of 50 ppm H<sub>2</sub>S. For viability assays, worms were exposed to H<sub>2</sub>S as fourth-stage larvae (L4) and scored for survival after 18–24 h. The effect of *skn-1(zu169)* mutations on viability in H<sub>2</sub>S was determined by picking sterile, non-Unc progeny of *skn-1/nT1* animals, and compared to Unc heterozygous siblings. To cross the *zu169* allele away from the *nT1* balancer, N2 males were crossed with *skn-1/nT1* mutant hermaphrodites. Non-Unc heterozygous F1 were allowed to produce F2 progeny, which were scored for sensitivity to H<sub>2</sub>S and the *skn-1* maternal effect lethal phenotype.

*skn-1(RNAi)* animals were generated by feeding N2 from starved L1 on HT115(DE3) bacteria carrying either the *skn-1* clone or empty vector control (L4440) from the Ahringer library [35].

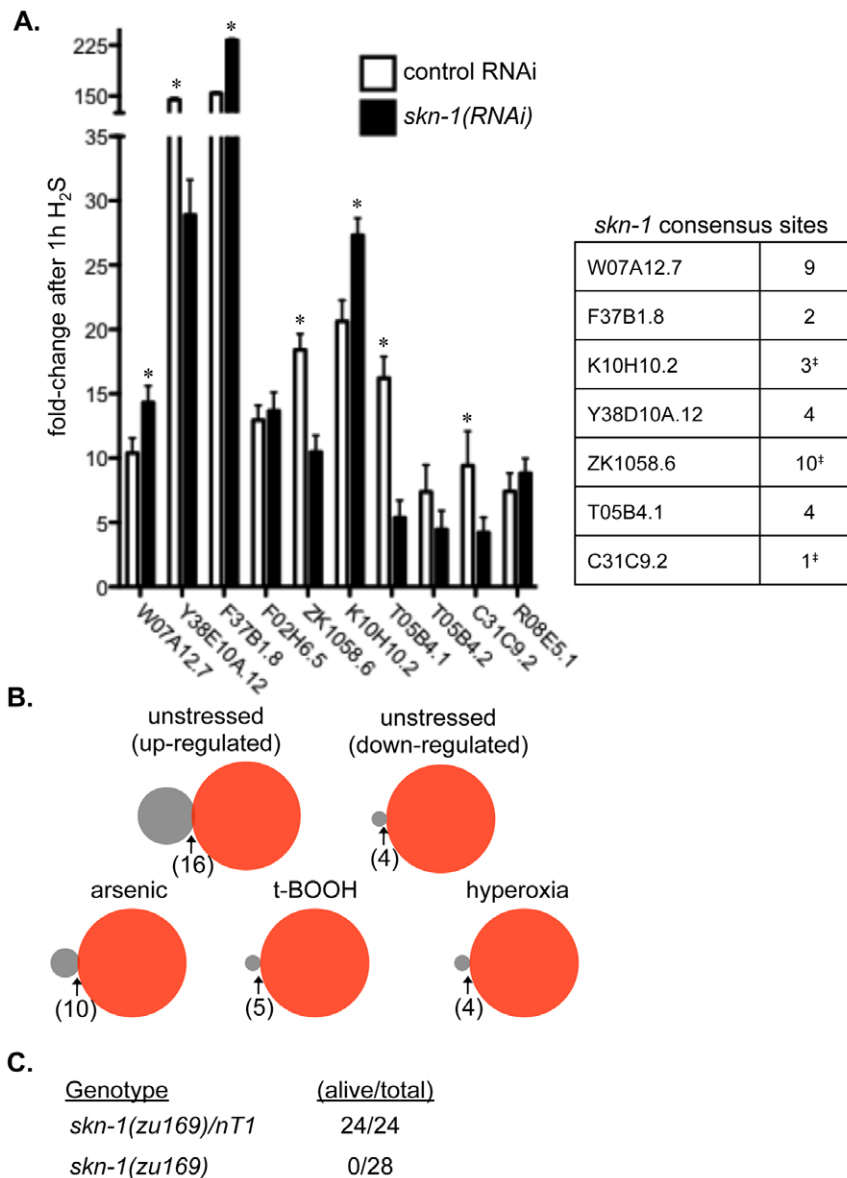

**Figure 3. SKN-1 is essential for appropriate response to H<sub>2</sub>S.** A. Some H<sub>2</sub>S-induced transcriptional changes require *skn-1*. Changes in mRNA abundance after 1 h exposure to H<sub>2</sub>S were measured by qRT-PCR in N2 animals grown on control RNAi food L4440 (open bars) or on *skn-1(RNAi)* (filled bars). Three biological replicates for each group were performed, and each PCR reaction was run in duplicate. Error bars represent the standard deviation of the biological replicates, propagated through the  $\Delta\Delta C_t$  and fold-change calculations. \*Difference between induction in control is significantly different than *skn-1(RNAi)*  $p < 0.05$ . Table shows the frequency that core *skn-1* consensus sites (RTACT, [27]) are found within the upstream 2 kb flanking region of each transcript whose regulation in response to H<sub>2</sub>S was altered by *skn-1(RNAi)*. <sup>†</sup>genes reported to have SKN-1 bound in the promoter in the ModENCODE database [38]. B. There is little similarity between response to H<sub>2</sub>S and other *skn-1*-dependent transcriptional responses. The overlap between the H<sub>2</sub>S-regulated genes after 12 h ( $n = 445$ ) was greater than chance when compared with *skn-1*-dependent gene products in unstressed conditions ( $n = 233$ , 16 common transcripts, hypergeometric probability 0.006) and for genes that require *skn-1* for arsenic-induced upregulation ( $n = 118$ , 10 common transcripts, hypergeometric probability 0.01) [27]. There was not significant overlap between transcripts altered by exposure to H<sub>2</sub>S and *skn-1* dependent transcripts that are downregulated in unstressed conditions ( $n = 63$ , hypergeometric probability 0.13), upregulated by tert-butyl hydroperoxide ( $n = 64$ , hypergeometric probability 0.06) or hyperoxia ( $n = 68$ , hypergeometric probability 0.15). C. *skn-1* is required to survive exposure to H<sub>2</sub>S. Unc animals (*skn-1/nT1* heterozygotes) were compared to non-Unc, *skn-1* homozygotes for sensitivity to H<sub>2</sub>S (#animals alive/total after exposure to 50 ppm H<sub>2</sub>S). doi:10.1371/journal.pone.0025476.g003

RNAi by feeding was essentially as described [35]. Bacteria expressing the dsRNA was diluted from an overnight culture grown in LB containing 25 mM carbenicillin and 10 mM tetracycline, regrown to OD<sub>600</sub> ~0.6 in LB with 25 mM carbenicillin and then seeded onto NGM-lite plates that contained 3 mM isopropyl  $\beta$ -D-1-thiogalactopyranoside and 25 mM carbenicillin. RNAi plates were allowed to dry overnight, stored at 4°C, and used within 5 days of being seeded. *skn-1(RNAi)* adults laid only dead embryos.

#### RNA sample isolation

For microarray and qRT-PCR experiments, animals were synchronized as starved first-stage larvae (L1) after isolating embryos by hypochlorite treatment. For microarray analysis, 3000 starved L1 were distributed onto 15 cm NGM/OP50 plates, with each independent replicate performed on a different day. For quantitative RT-PCR (qRT-PCR), 1000 L1 larvae were distributed onto 10 cm NGM/OP50 plates. *C. elegans* were exposed to

H<sub>2</sub>S on plates for the amount of time indicated immediately prior to harvest. All animals were harvested as first-day gravid adults (schematized in Figure 1A). For nematode harvest, plates were removed from H<sub>2</sub>S, the worms were immediately rinsed off the plates with distilled water, caught on a 43-micron nylon filter and collected by centrifugation. 100 µL of sedimented worms were added to 900 µL Trizol (Invitrogen, Carlsbad, CA), frozen in liquid nitrogen and stored at -70°C. Less than 2 min elapsed from when plates were removed from H<sub>2</sub>S until samples were frozen. Frozen samples were thawed, vortexed for 30 s, and the RNA was isolated following the protocol included with the Trizol manual, followed by isopropanol precipitation.

### Microarray expression profiling and analysis

Each RNA sample was labelled, hybridized to a single-channel Nimblegen 4×72 K (build 160) expression array, and scanned following manufacturer's suggested protocols by the Fred Hutchinson Cancer Research Center's DNA Array Facility. Three biological replicates for each H<sub>2</sub>S-treated sample (1, 12 and 48 h exposure) and 5 biological replicates from untreated controls were used. Data were RMA normalized and probe-level data were summarized with the NimbleScan software. Genes with weak signal intensity across all groups and those with low variability across samples were excluded from further analysis. Each H<sub>2</sub>S-treated sample was statistically compared to a matched untreated control using the Bioconductor package *limma* [36]. The false discovery rate (FDR) method of Benjamini and Hochberg [37] was used to adjust p-values for multiple testing. An adjusted p-value ≤ 0.05 was used to define differential expression. Results were annotated using WormBase WS190 ([www.wormbase.org](http://www.wormbase.org)). Expression results and microarray raw intensity files, in compliance with MIAME guidelines, can be accessed through the Gene Expression Omnibus ([www.ncbi.nlm.nih.gov/geo/](http://www.ncbi.nlm.nih.gov/geo/)) and are accessible through GEO series accession number GSE25199. Functional annotation clustering analysis was performed using the Database for Annotation, Visualization and Integrated Discovery (DAVID) v6.7 (<http://david.abcc.ncifcrf.gov/home.jsp>). Gene list submitted for 12 h exposure to H<sub>2</sub>S included only the 91 gene products with logFC > 1.6 (fold change > 3). For the 48 h dataset, the 95 gene products with logFC > 2.5 (fold change > 5.5) were included. In both cases, the *C. elegans* background list in the database was used with default analysis parameters. Using only gene products included in the analysis after filtering did not alter the results. Annotation clusters that included at least one term with p < 0.05 were considered to be functionally enriched clusters.

Hypergeometric probabilities were calculated including all 11,522 features included in the microarray analysis as the population, with successes and sample size as defined in the text (<http://stattrek.com/tables/hypergeometric.aspx>). The number of successes in each sample (overlap) was determined by manually comparing data from H<sub>2</sub>S-induced changes measured by our microarray experiments and hypoxia-induced genes [15] or *skn-1*-dependent transcripts [27,28]. Probabilities less than 0.05 were considered significant. Core *skn-1* consensus sites in the promoter region of candidate transcripts were defined manually, based on the published consensus RTCAT [27]. The promoter region was defined as 2 kb upstream of the start site. The ModENCODE database [38] was searched to determine if any of the 7 transcripts changed in a *skn-1*-dependent changes in response to H<sub>2</sub>S were shown to have SKN-1::GFP bound in the promoter.

### Real-time RT-PCR (qRT-PCR)

Quantitative RT-PCR (qRT-PCR) was used to validate microarray measurements and determine if H<sub>2</sub>S-dependent changes occurred in

*hif-1(a04)* or *skn-1(RNAi)* animals. mRNA was isolated as described above, and cDNA was synthesized from 300 ng of RNA using the included random primers using the ProtoScript M-MuLV First Strand cDNA Synthesis Kit (New England Biolabs) according to manufacturer's suggested protocol. Primers to amplify cDNA targets were designed using Primer3 (<http://frodo.wi.mit.edu/primer3/>). When possible, primer pairs spanned a small intron so that genomic and cDNA amplification products could be distinguished by agarose gel electrophoresis. Primer sequences are available upon request. Primers were tested to ensure amplification of the correct size genomic target, and then calibrated against serial dilutions of genomic DNA. qRT-PCR reactions were performed using an *ep realplex*<sup>2</sup> S (Eppendorf). Each 10 µL reaction contained 5 µL 2X KAPA SYBR green Master Mix (Kapa Biosystems), 0.45 µL cDNA and 3 µL primers (10 µM each primer). Reactions were performed in duplicate and at least three independent biological replicates were included for each condition. Each experiment included primers that amplified only genomic DNA (negative controls to identify background signal levels) as well as 4 control targets (*mir-2.1*, *tba-1*, *irs-2*, and *hif-1*) that are not affected by H<sub>2</sub>S exposure for normalization.  $\Delta C_t$  for each gene product was calculated by subtracting  $C_t$  values from the geometric mean of the control targets [39].  $\Delta C_t$  were averaged across the three experiments. Student's t-test was used to evaluate differences between  $\Delta C_t$  values of treated samples and untreated controls (EXCEL). For differences between genotypes (Figures 2 and 3), p-values were calculated by one-way Anova from summary statistics (mean, standard deviation, n) ([www.statpages.org](http://www.statpages.org)). Reported fold-changes were calculated as  $2^{-\Delta\Delta C_t}$  [40], where  $\Delta\Delta C_t = \Delta C_t(\text{H}_2\text{S}) - \Delta C_t(\text{untreated})$ . Error bars on graphs represent standard deviation, which was carried through the fold-change calculation using standard error propagation (reported as "variance").

### Supporting Information

**Table S1** Transcripts that are significantly changed after 12 h exposure to H<sub>2</sub>S, listed in order of magnitude fold-change. (PDF)

**Table S2** Transcripts that are significantly changed after 48 h exposure to H<sub>2</sub>S, listed in order of magnitude fold-change. (PDF)

**Table S3** Genes included in functional annotation clusters. (PDF)

**Table S4** Transcripts altered by both 1 h exposure to H<sub>2</sub>S and hypoxia. (PDF)

**Table S5** Transcripts regulated by *skn-1* in other studies that are altered by exposure to H<sub>2</sub>S. (PDF)

### Acknowledgments

Microarray experiments and analysis were performed with the expert assistance of Dr. Jeff Delrow (FHCRC DNA Array Facility), and Dr. Jerry Davison (FHCRC Computational Biology) provided valuable assistance with data analysis. Some nematode strains used in this work were provided by the *Caenorhabditis* Genetics Center, which is funded by the NIH National Center for Research Resources (NCRR).

### Author Contributions

Conceived and designed the experiments: DLM MWB MBR. Performed the experiments: DLM MWB. Analyzed the data: DLM MWB. Wrote the paper: DLM.

## References

- Blackstone E, Morrison M, Roth MB (2005) H<sub>2</sub>S induces a suspended animation-like state in mice. *Science* 308: 518.
- Blackstone E, Roth MB (2007) Suspended animation-like state protects mice from lethal hypoxia. *Shock* 27: 370–372.
- Morrison ML, Blackwood JE, Lockett SL, Iwata A, Winn RK, et al. (2008) Surviving blood loss using hydrogen sulfide. *J Trauma* 65: 183–188.
- Elrod JW, Calvert JW, Morrison J, Doeller JE, Kraus DW, et al. (2007) Hydrogen sulfide attenuates myocardial ischemia-reperfusion injury by preservation of mitochondrial function. *PNAS* 104: 15560–15565.
- Simon F, Giudici R, Duy CN, Schelzig H, Oter S, et al. (2008) Hemodynamic and metabolic effects of hydrogen sulfide during porcine ischemia/reperfusion injury. *Shock* 30: 359–364.
- Jha S, Calvert JW, Duranski MR, Ramachandran A, Lefer DJ (2008) Hydrogen sulfide attenuates hepatic ischemia-reperfusion injury: role of antioxidant and antiapoptotic signaling. *Am J Physiol Heart Circ Physiol* 295: H801–806.
- Miller DL, Roth MB (2007) Hydrogen sulfide increases thermotolerance and lifespan in *Caenorhabditis elegans*. *PNAS* 104: 20618–20622.
- Budde MW, Roth MB (2010) Hydrogen sulfide increases hypoxia-inducible factor-1 activity independently of von Hippel-Lindau tumor suppressor-1 in *C. elegans*. *Mol Biol Cell* 21: 212–217.
- Jiang H, Guo R, Powell-Coffman JA (2001) The *Caenorhabditis elegans* *hif-1* gene encodes a bHLH-PAS protein that is required for adaptation to hypoxia. *PNAS* 98: 7916–7921.
- Semenza GL (2000) HIF-1: mediator of physiological and pathophysiological responses to hypoxia. *J Appl Physiol* 88: 1474–1480.
- Haigis MC, Yankner BA (2010) The aging stress response. *Mol Cell* 40: 333–344.
- Chen D, Thomas EL, Kapahi P (2009) HIF-1 modulates dietary restriction-mediated lifespan extension via IRE-1 in *Caenorhabditis elegans*. *PLoS Genet* 5: e1000486.
- Mehta R, Steinkraus KA, Sutphin GL, Ramos FJ, Shamieh LS, et al. (2009) Proteasomal regulation of the hypoxic response modulates aging in *C. elegans*. *Science* 324: 1196–1198.
- Zhang Y, Shao Z, Zhai Z, Shen C, Powell-Coffman JA (2009) The HIF-1 hypoxia-inducible factor modulates lifespan in *C. elegans*. *PLoS ONE* 4: e6348.
- Shen C, Nettleton D, Jiang M, Kim SK, Powell-Coffman JA (2005) Roles of the HIF-1 hypoxia-inducible factor during hypoxia response in *Caenorhabditis elegans*. *J Biol Chem* 280: 20580–20588.
- Huang da W, Sherman BT, Lempicki RA (2009) Systematic and integrative analysis of large gene lists using DAVID bioinformatics resources. *Nat Protoc* 4: 44–57.
- Dennis G, Jr., Sherman BT, Hosack DA, Yang J, Gao W, et al. (2003) DAVID: Database for Annotation, Visualization, and Integrated Discovery. *Genome Biol* 4: P3.
- Skowrya D, Craig KL, Tyers M, Elledge SJ, Harper JW (1997) F-box proteins are receptors that recruit phosphorylated substrates to the SCF ubiquitin-ligase complex. *Cell* 91: 209–219.
- Bai C, Sen P, Hofmann K, Ma L, Goebel M, et al. (1996) SKP1 connects cell cycle regulators to the ubiquitin proteolysis machinery through a novel motif, the F-box. *Cell* 86: 263–274.
- Geyer R, Wee S, Anderson S, Yates J, Wolf DA (2003) BTB/POZ domain proteins are putative substrate adaptors for cullin 3 ubiquitin ligases. *Mol Cell* 12: 783–790.
- Semenza GL (2000) HIF-1 and human disease: one highly involved factor. *Genes Dev* 14: 1983–1991.
- Budde MW, Roth MB (2011) The Response of *Caenorhabditis elegans* to Hydrogen Sulfide and Hydrogen Cyanide. *Genetics*, epub ahead of print PMID: 21840852.
- Robertson SM, Shetty P, Lin R (2004) Identification of lineage-specific zygotic transcripts in early *Caenorhabditis elegans* embryos. *Dev Biol* 276: 493–507.
- Bowerman B, Eaton BA, Priess JR (1992) *skn-1*, a maternally expressed gene required to specify the fate of ventral blastomeres in the early *C. elegans* embryo. *Cell* 68: 1061–1075.
- An JH, Blackwell TK (2003) SKN-1 links *C. elegans* mesodermal specification to a conserved oxidative stress response. *Genes Dev* 17: 1882–1893.
- Bishop NA, Guarente L (2007) Two neurons mediate diet-restriction-induced longevity in *C. elegans*. *Nature* 447: 545–549.
- Oliveira RP, Porter Abate J, Dilks K, Landis J, Ashraf J, et al. (2009) Condition-adapted stress and longevity gene regulation by *Caenorhabditis elegans* SKN-1/Nrf. *Aging Cell* 8: 524–541.
- Park SK, Tedesco PM, Johnson TE (2009) Oxidative stress and longevity in *Caenorhabditis elegans* as mediated by SKN-1. *Aging Cell* 8: 258–269.
- Nicholson CK, Calvert JW (2010) Hydrogen sulfide and ischemia-reperfusion injury. *Pharmacol Res* 62: 289–297.
- Calvert JW, Coetzee WA, Lefer DJ (2010) Novel insights into hydrogen sulfide-mediated cytoprotection. *Antioxid Redox Signal* 12: 1203–1217.
- Loor G, Schumacker PT (2008) Role of hypoxia-inducible factor in cell survival during myocardial ischemia-reperfusion. *Cell Death Differ* 15: 686–690.
- Morimoto RI, Cuervo AM (2009) Protein homeostasis and aging: taking care of proteins from the cradle to the grave. *J Gerontol A Biol Sci Med Sci* 64: 167–170.
- Bowerman B, Tax FE, Thomas JH, Priess JR (1992) Cell interactions involved in development of the bilaterally symmetrical intestinal valve cells during embryogenesis in *Caenorhabditis elegans*. *Development* 116: 1113–1122.
- Brenner S (1974) The genetics of *Caenorhabditis elegans*. *Genetics* 77: 71–94.
- Kamath RS, Fraser AG, Dong Y, Poulin G, Durbin R, et al. (2003) Systematic functional analysis of the *Caenorhabditis elegans* genome using RNAi. *Nature* 421: 231–237.
- Smyth GK (2005) Limma: linear models for microarray data. In: Gentleman R, Carey V, Dudoit S, Irizarry R, Huber W, eds. *Bioinformatics and Computational Biology Solutions using R and Bioconductor*. pp 397–420.
- Benjamini Y, Hochberg Y (1995) Controlling the False Discovery Rate: A Practical and Powerful Approach to Multiple Testing. *Journal of the Royal Statistical Society Series B (Methodological)* 57: 289–300.
- Celniker SE, Dillon LA, Gerstein MB, Gunsalus KC, Henikoff S, et al. (2009) Unlocking the secrets of the genome. *Nature* 459: 927–930.
- Vandesompele J, De Preter K, Pattyn F, Poppe B, Van Roy N, et al. (2002) Accurate normalization of real-time quantitative RT-PCR data by geometric averaging of multiple internal control genes. *Genome Biol* 3: RESEARCH0034.
- Schmittgen TD, Livak KJ (2008) Analyzing real-time PCR data by the comparative C(T) method. *Nat Protoc* 3: 1101–1108.
