# Supplementary material for: HIF-1 and SKN-1 Coordinate the Transcriptional Response to Hydrogen Sulfide in Caenorhabditis elegans
Source: PLOS journal article supplement (doi:10.1371/journal.pone.0025476), 2011-09-29
Supplement: S4 (10.1371/journal.pone.0025476.s004) [file journal.pone.0025476.s004]

| Supporting Table 4: Genes regulated by both H <sub>2</sub> S and hypoxia            |                                    |
|-------------------------------------------------------------------------------------|------------------------------------|
| <b>genes regulated by H<sub>2</sub>S (1h) and hypoxia (<i>hif-1</i>-dependent)</b>  |                                    |
| <i>cysl-2</i><br><i>nhr-57</i><br><i>rhy-1</i>                                      |                                    |
| <b>genes regulated by H<sub>2</sub>S (12h) and hypoxia (<i>hif-1</i>-dependent)</b> |                                    |
| <u>increased in H<sub>2</sub>S</u>                                                  | <u>decreased in H<sub>2</sub>S</u> |
| <i>cyp-36A1</i>                                                                     | F45D11.1.1                         |
| <i>cysl-2</i>                                                                       | <i>ketn-1</i>                      |
| <i>rhy-1</i>                                                                        | R10D12.1                           |
| <b>genes regulated by H<sub>2</sub>S (12h) and hypoxia (all)</b>                    |                                    |
| <u>increased in H<sub>2</sub>S</u>                                                  | <u>decreased in H<sub>2</sub>S</u> |
| <i>clcc-222</i>                                                                     | <i>amx-2</i>                       |
| <i>cyp-36A1</i>                                                                     | F10D11.6                           |
| F19B10.2                                                                            | K10G6.4                            |
| <i>cysl-2</i>                                                                       | R10D12.1                           |
| M05D6.6                                                                             | <i>grd-6</i>                       |
| M162.5                                                                              | Y57G11C.21                         |
| <i>rbx-2</i>                                                                        |                                    |
| <i>srv-7</i>                                                                        |                                    |

Overlap shown in Figure 2B of main text  
hypoxia-regulated genes from Shen et al (2005)
