# Supplementary material for: HIF-1 and SKN-1 Coordinate the Transcriptional Response to Hydrogen Sulfide in Caenorhabditis elegans
Source: PLOS journal article supplement (doi:10.1371/journal.pone.0025476), 2011-09-29
Supplement: S5 (10.1371/journal.pone.0025476.s005) [file journal.pone.0025476.s005]

Supporting Table 5: Genes changed in H<sub>2</sub>S and regulated by *skn-1*

**upregulated by *skn-1* in unstressed conditions\***

| <u>increased in H<sub>2</sub>S</u> | <u>decreased in H<sub>2</sub>S</u> |
|------------------------------------|------------------------------------|
| C31C9.2                            | <i>kqt-2</i>                       |
| <i>nspa-9</i>                      | <i>pcp-2</i>                       |
| <i>clec-17</i>                     | <i>ifp-1</i>                       |
| F01D5.3                            | <i>amt-1</i>                       |
| F01D5.5                            |                                    |
| <i>gst-4</i>                       |                                    |
| <i>cysl-2</i>                      |                                    |
| <i>dhs-23</i>                      |                                    |
| <i>nspa-8</i>                      |                                    |
| <i>rhy-1</i>                       |                                    |
| <i>nspa-5</i>                      |                                    |
| <i>nit-1</i>                       |                                    |

**down-regulated by *skn-1* in unstressed conditions\***

| <u>increased in H<sub>2</sub>S</u> | <u>decreased in H<sub>2</sub>S</u> |
|------------------------------------|------------------------------------|
| <i>ilys-2</i>                      | Y39B6A.24                          |
| Y47H9C.1                           |                                    |
| <i>ins-7</i>                       |                                    |

**upregulated by arsenic stress\***

| <u>increased in H<sub>2</sub>S</u> | <u>decreased in H<sub>2</sub>S</u> |
|------------------------------------|------------------------------------|
| <i>nspa-9</i>                      | <i>pcp-2</i>                       |
| F01D5.3                            |                                    |
| <i>gst-4</i>                       |                                    |
| <i>cysl-2</i>                      |                                    |
| M05D6.6                            |                                    |
| <i>dhs-23</i>                      |                                    |
| <i>nspa-8</i>                      |                                    |
| <i>nspa-5</i>                      |                                    |
| <i>nit-1</i>                       |                                    |

**upregulated by t-butyl hydroperoxide\***

| <u>increased in H<sub>2</sub>S</u> | <u>decreased in H<sub>2</sub>S</u> |
|------------------------------------|------------------------------------|
| C31C9.2                            | <i>amt-1</i>                       |
| <i>gst-4</i>                       | C01G5.4                            |
| <i>nit-1</i>                       |                                    |

**regulated in hyperoxia<sup>#</sup>**

increased in H<sub>2</sub>S

*gst-16*  
*gst-4*  
*hsp-16.41*<sup>+</sup>  
*nsp-16.2*<sup>+</sup>

Overlapping genes referred to in Figure 3B of main text

\**skn-1*-dependent transcripts from Oliveira et al (2009)

<sup>#</sup>*skn-1*-dependent transcripts from Park et al (2009)

<sup>+</sup>downregulated in hyperoxia
